# Supplementary material
Source: PubMed Central journal article supplement (PMC3249093)
Supplement: supp_M111.290361_jbc.M111.290361-1.pdf [file supp_M111.290361_jbc.M111.290361-1.pdf]

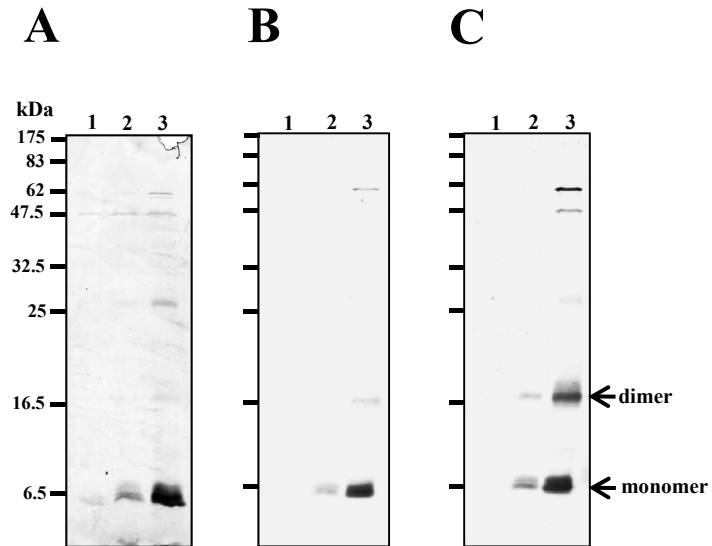

**Fig. S1. Antigenicity of His-tagged Lpp to anti-His and anti-Lpp antibodies.** Increasing amounts of His-tagged Lpp were separated by 14% SDS-PAGE and analyzed by silver staining (A) and Western blot using anti-His<sub>6</sub> antibody (B) and anti-Lpp antibody (C), Lane 1, 0.025 µg; lane 2, 0.1 µg; lane 3, 0.4 µg.
